# Supplementary material for: X-ray absorption near edge structure simulation of LiNi0.5Co0.2Mn0.3O2via first-principles calculation
Source: Royal Society of Chemistry journal article supplement (doi:10.1039/c9ra03606g), 2019-01-01
Supplement: c9ra03606g1.pdf [file c9ra03606g1.pdf]

## Supplementary information

### **X-ray Absorption Near Edge Structure Simulation of LiNi<sub>0.5</sub>Co<sub>0.2</sub>Mn<sub>0.3</sub>O<sub>2</sub> via First-principles Calculation**

Toshiharu Ohnuma and Takeshi Kobayashi

Material Science Research Laboratory, Central Research Institute of Electric Power Industry (CRIEPI), 2-6-1 Nagasaka, Yokosuka-shi, Kanagawa-ken 240-0196, Japan

Table S1. Bader charge and atomic volume of Li1.0-NCM523 and Li0.5-NCM523

|       |                                      | Bader charge | Atomic volume(Å <sup>3</sup> ) |
|-------|--------------------------------------|--------------|--------------------------------|
| Li1.0 | Ni <sup>2+</sup>                     | 8.85         | 8.63                           |
|       | Ni <sup>3+</sup>                     | 8.79         | 7.86                           |
| Li/Ni | Ni <sup>2+</sup> (Ni <sub>Li</sub> ) | 8.80         | 8.80                           |
| Li0.5 | Ni <sup>2+</sup>                     | 8.84         | 8.86                           |
|       | Ni <sup>3+</sup>                     | 8.76         | 8.06                           |
|       | Ni <sup>4+</sup>                     | 8.76         | 7.15                           |
| Li/Ni | Ni <sup>2+</sup> (Ni <sub>Li</sub> ) | 8.74         | 9.47                           |

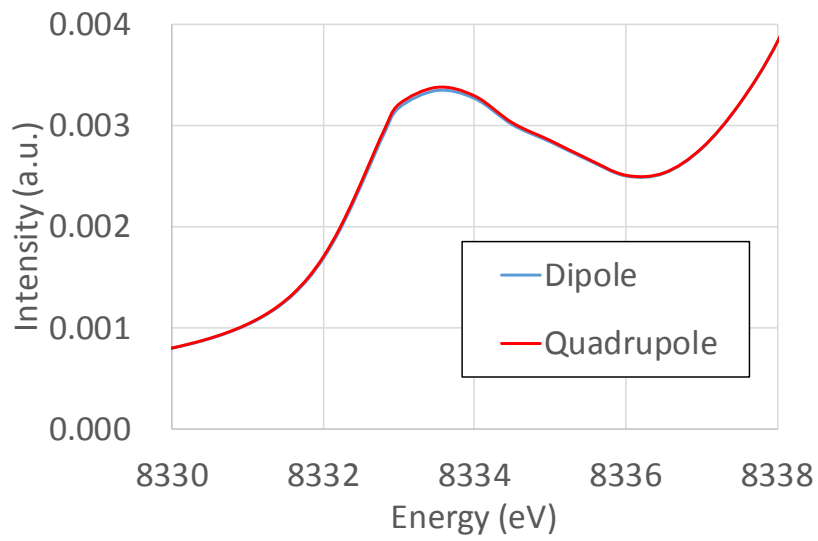

Fig. S1. Difference between quadrupole and dipole calculation at the  $\text{Ni}_{\text{Li}}$  pre-edge of  $\text{Li}_{0.5}\text{-NCM523}$ .

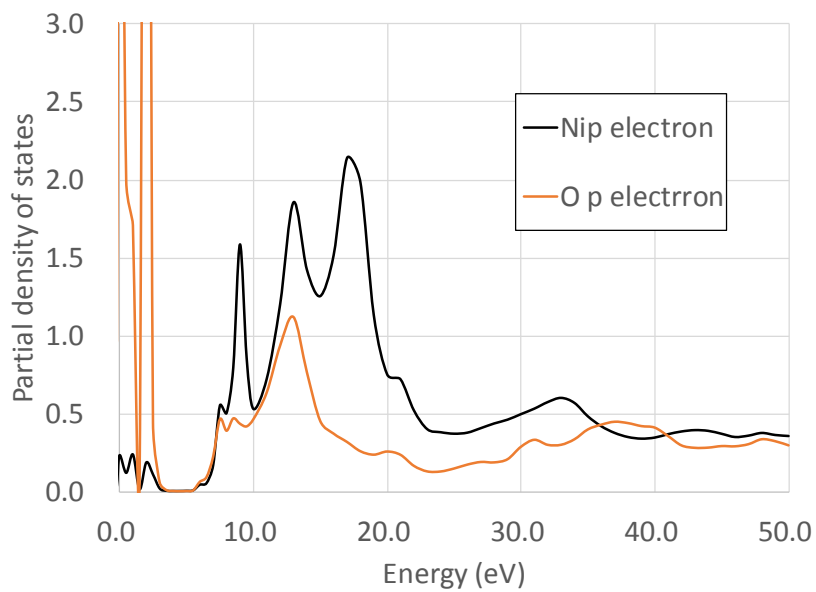

Fig. S2. Partial density of states of p electrons of  $\text{Ni}_{\text{Li}}$  of  $\text{Li}_{0.5}\text{-NCM523}$ . It can be understood that pre-edge peak is caused by hybridization of Ni p electrons with the nearest O p electrons.

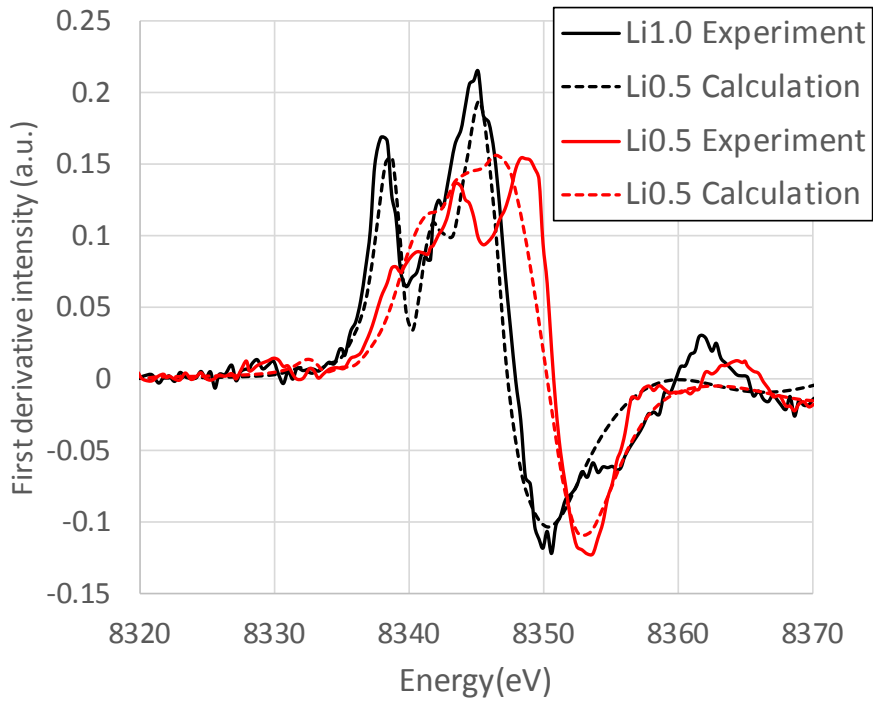

Fig. S3. First derivatives of XANES spectra in the Ni K-edge of Li-0.5 and Li-1.0 NCM523 via experiment and calculation.

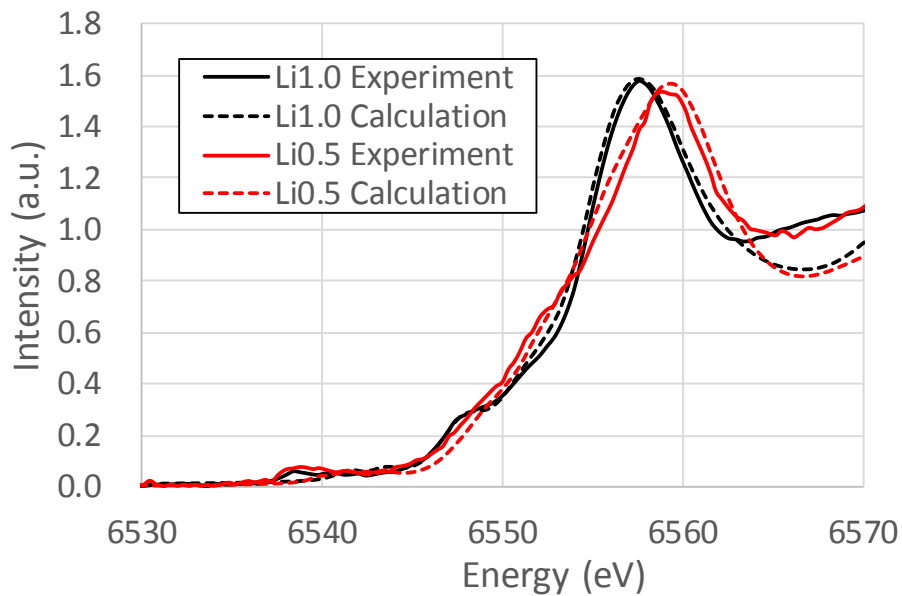

Fig. S4. XANES spectra of the Mn K-edge of Li-0.5 and Li-1.0 NCM523 via experiment and calculation.

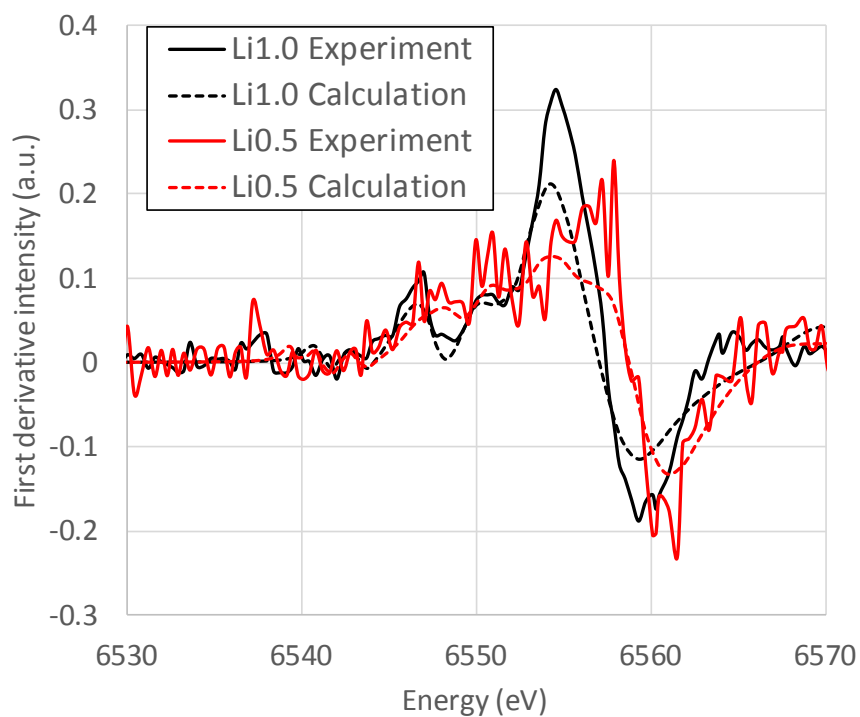

Fig. S5. First derivatives of XANES spectra in the Mn K-edge of Li-0.5 and Li-1.0 NCM523 via experiment and calculation.

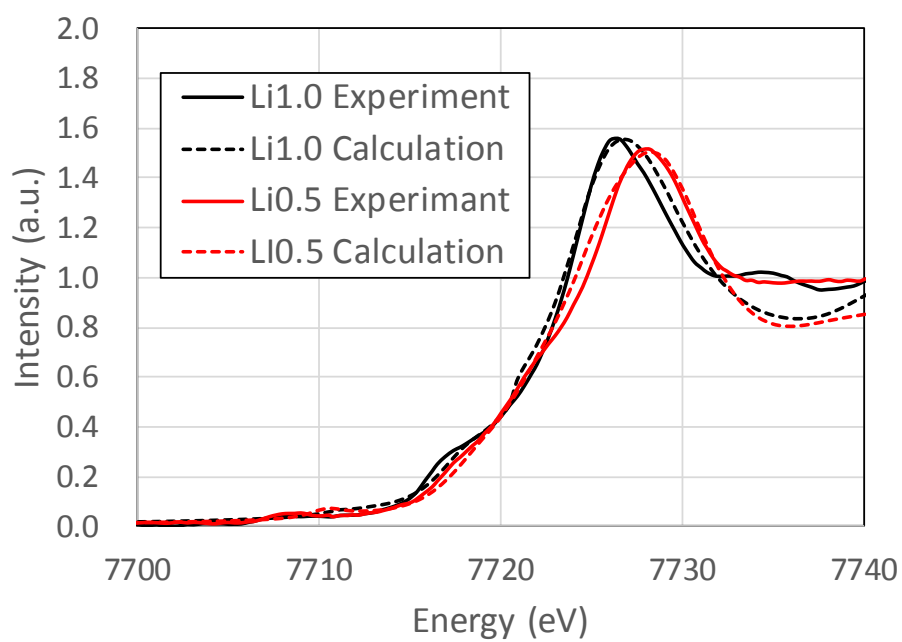

Fig. S6. XANES spectra of the Co K-edge of Li-0.5 and Li-1.0 NCM523 via experiment and calculation.

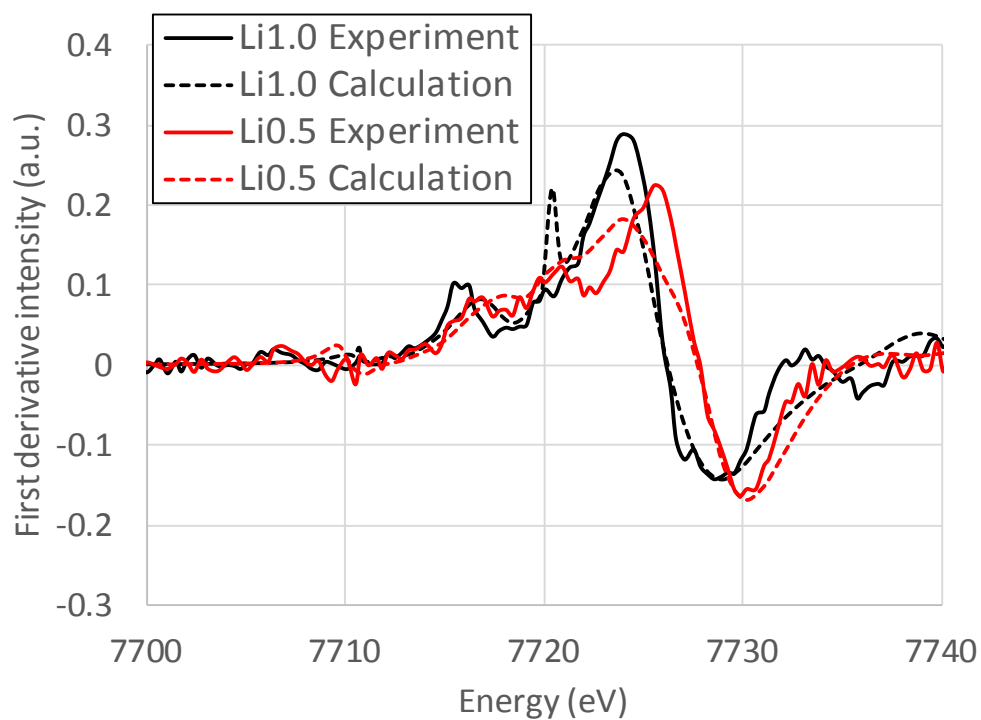

Fig. S7. First derivatives of XANES spectra in the Co K-edge of Li-0.5 and Li-1.0 NCM523 via experiment and calculation.

FDMNES input file for Li1.0

Absorber

1 2 3 4 5 6 7 8 9 10 11 12 13 14 15 16 17 18 19 20 21 22 23 24 25 26 27 28 29 30

Filout

NiK

Range

-12. 0.2 0. 0.5 10. 1. 50.

Edge

K

Radius

7.0

Density

state\_all

Adimp

0.19

magnetism

Quadrupole

Atom\_conf

11 1 4 5 11 14 17 18 21 25 26 28 1 3 2 4.5 3.5

19 2 3 6 7 8 9 10 12 13 15 16 19 20 22 23 24 27 29 30 1 3 2 5.0 3.0

12 31 32 33 34 35 36 37 38 39 40 41 42 1 3 2 3.5 3.5

18 43 44 45 46 47 48 49 50 51 52 53 54 55 56 57 58 59 60 1 3 2 1.0 4.0

Hubbard

5.96 5.0 5.1

FDMNES input file for Li0.5

Absorber

1 2 3 4 5 6 7 8 9 10 11 12 13 14 15 16 17 18 19 20 21 22 23 24 25 26 27 28 29 30

Filout

NiK

Range

! Energy range of calculation (eV)

-12. 0.2 0. 0.5 10. 1. 50. ! first energy, step, intermediary energy, step ..., last energy

Edge

K

Radius

7.0

Density

state\_all

Adimp

0.19

magnetism

Quadrupole

Atom\_conf

2 7 15 1 3 2 5.0 3.0

16 1 2 3 5 9 14 18 19 20 21 24 25 26 27 29 30 1 3 2 4.5 3.5

12 4 6 8 10 11 12 13 16 17 22 23 28 1 3 2 4.0 4.0

1 34 1 3 2 4.0 3.0

11 31 32 33 35 36 37 38 39 40 41 42 1 3 2 3.5 3.5

18 43 44 45 46 47 48 49 50 51 52 53 54 55 56 57 58 59 60 1 3 2 1.0 4.0

Hubbard

5.96 5.0 5.1
